# Supplementary material for: Data-Derived Modeling Characterizes Plasticity of MAPK Signaling in Melanoma
Source: PLoS Comput Biol. 2014 Sep 4;10(9):e1003795. doi: 10.1371/journal.pcbi.1003795 (PMC4154640; doi:10.1371/journal.pcbi.1003795)
Supplement: Table S1 — Extension of data-derived sensitivity analysis to all experimental conditions. The analysis resampling the data to evaluate flexibility and accuracy of the approach, as described in Figure 4 for control conditions, was performed for all conditions. The model implementation and training setup featuring fixed premise parameters and adaptive linear consequent parameters was contrasted to two established setups: (i) A system with adaptive premise parameters and adaptive zero-order consequent parameters and (ii) a system with adaptive premise parameters and adaptive linear consequent parameters, i.e. the same setup as the fixed-linear system with the difference that here the premise parameters were not fixed. For each condition, a reference system was created which was trained to all data points acquired in said condition. The RMSE was calculated for the reference model as a metric of accuracy. The training data set was resampled 100 times via bootstrapping and the standard deviation of the simulations at each data point was calculated as a metric of flexibility (first raw for each modeling approach). The error of every bootstrapped model was calculated, and the deviation for all 100 models is shown (second raw for each setup). Ranking the calculations for the metrics of the setups for each condition shows that the first in accuracy (third raw for each modeling approach), i.e. the setup with least references error is the adaptive-linear closely followed by the fixed-linear. The most robust setup is the adaptive-constant, and the fixed-linear and adaptive-linear perform similarly, indicating that neither accuracy nor flexibility are greatly compromised by using the parameter-reduced setup. See main text for further details on the resampling rationale. (XLS) [file pcbi.1003795.s004.xls]

## Sheet: Tabelle1
		control		U0126		AZD6244		Sorafenib
	metric	value	rank	value	rank	value	rank	value	rank
fixed-linear		0.188	3	0.193	3	0.165	2	0.249	3
		0.079	3	0.076	3	0.073	2	0.084	3
		0.122	2	0.197	2	0.212	2	0.191	2
Adaptive-constant		0.156	1	0.126	1	0.112	1	0.191	1
		0.078	2	0.056	1	0.06	1	0.065	1
		0.167	3	0.223	3	0.23	3	0.211	3
Adaptive-linear		0.186	2	0.169	2	0.174	3	0.234	2
		0.077	1	0.057	2	0.073	3	0.075	2
		0.121	1	0.194	1	0.208	1	0.188	1
